# Supplementary material for: Effect of Second-Hand Smoke Exposure on Establishing Urinary Cotinine-Based Optimal Cut-Off Values for Smoking Status Classification in Korean Adults
Source: MDPI journal article supplement (doi:10.3390/ijerph19137971), 2022-06-29
Supplement: s1 [file s1]

**Supplementary Table S1.** Dataset recruitment

| Dataset      | Survey project                                                                                                                | Year | Survey Institution                               |
|--------------|-------------------------------------------------------------------------------------------------------------------------------|------|--------------------------------------------------|
| 2008 KNHANES | The Fourth Korea National Health and Nutrition Examination Survey<br>(KNHANES IV-2)                                           | 2008 | Korea Centers for Disease Control and Prevention |
| 2011 KNHANES | The Fifth Korea National Health and Nutrition Examination Survey<br>(KNHANES V-2)                                             | 2011 | Korea Centers for Disease Control and Prevention |
| 2014 KNHANES | The Sixth Korea National Health and Nutrition Examination Survey<br>(KNHANES VI-2)                                            | 2014 | Korea Centers for Disease Control and Prevention |
| 2018 KNHANES | The Seventh Korea National Health and Nutrition Examination Survey<br>(KNHANES VII-3)                                         | 2018 | Korea Centers for Disease Control and Prevention |
| Access link  | <a href="https://knhanes.kdca.go.kr/knhanes/sub03/sub03_02_05.do">https://knhanes.kdca.go.kr/knhanes/sub03/sub03_02_05.do</a> |      |                                                  |

**Supplementary Table S2.** Raw variant codes related with self-report for smoking status classification in all datasets

| Variant code | Description            | Questionnaire                                         | Subvariant | Subvariant status                                        |
|--------------|------------------------|-------------------------------------------------------|------------|----------------------------------------------------------|
| BS1_1        | Life smoking status    | How many cigarettes have you smoked in your lifetime? | 1          | Less than 5 packs (100 cigarettes)                       |
|              |                        |                                                       | 2          | Equal to or more than 5 packs (100 cigarettes)           |
|              |                        |                                                       | 3          | Never smoked                                             |
| BS3_1        | current smoking status | Do you currently smoke?                               | 1          | Yes, I smoke at least one cigarette a day                |
|              |                        |                                                       | 2          | Yes, I smoke, but not every day                          |
|              |                        |                                                       | 3          | No, but I smoked in the past                             |
|              |                        |                                                       | 8          | Not included (BS1_1=3 or <19 years)                      |
|              |                        |                                                       | 9          | Unknown/No response for self-report                      |
| sm_presnt    | current smoking rate   |                                                       | 0          | Non-smoker, former smoker                                |
|              |                        |                                                       | 1          | <u>Current smoker ( BS1_1=2 and [BS3_1=1 or BS3_1=2)</u> |

**Supplementary Table S3.** Data processing related with self-report for smoking status classification in all datasets

| Smoking status   | Description                                                                                                             | Variant code     | Processing              |
|------------------|-------------------------------------------------------------------------------------------------------------------------|------------------|-------------------------|
| Current smoker   | a subject who reported a history of 100 cigarettes smoking in his or her lifetime reported currently smoking cigarettes | sm_presnt        | sm_presnt=1             |
| Non-smoker       | a subject who did not meet the current smoker definition among responded subjects for self-report for smoking status    | sm_presnt        | sm_presnt=0             |
| Daily smoker     | a subject who reported “Yes, I smoke at least one cigarette a day”, among current smokers                               | BS3_1, sm_presnt | BS3_1=1 and sm_presnt=1 |
| Non-daily smoker | a subject who reported “Yes, I smoke, but not every day”, among current smokers.                                        | BS3_1, sm_presnt | BS3_1=2 and sm_presnt=1 |

**Supplementary Table S4.** Raw variant codes related with self-report for SHS exposure status classification in each dataset

| Dataset | Variant code | Description                      | Questionnaire                                                                        | Subvariant | Subvariant status                                                               |
|---------|--------------|----------------------------------|--------------------------------------------------------------------------------------|------------|---------------------------------------------------------------------------------|
| 2008    | BS8_2        | SHS exposure at indoor workplace | How much did you inhale other's cigarette smoke indoors at work, in the past 7 days? | 1          | zero hour                                                                       |
|         |              |                                  |                                                                                      | 2          | Less than one hour                                                              |
|         |              |                                  |                                                                                      | 3          | Equal to or more than one hour                                                  |
|         |              |                                  |                                                                                      | 9          | Unknown/No response for self-report                                             |
|         | BS9_2        | SHS exposure at home             | How much did you inhale other's cigarette smoke indoors at home, in the past 7 days? | 1          | zero hour                                                                       |
|         |              |                                  |                                                                                      | 2          | Less than one hour                                                              |
|         |              |                                  |                                                                                      | 3          | Equal to or more than one hour                                                  |
|         |              |                                  |                                                                                      | 8          | Not included (<19 years, no one in the family regularly smokes indoors at home) |
|         |              |                                  |                                                                                      | 9          | Unknown/No response for self-report                                             |
| 2011    | BS8_2        | SHS exposure at indoor workplace | How much did you inhale other's cigarette smoke indoors at work, in the past 7 days? | 1          | zero hour                                                                       |
|         |              |                                  |                                                                                      | 2          | Less than one hour                                                              |
|         |              |                                  |                                                                                      | 3          | Equal to or more than one hour                                                  |

|      |       |                                  |                                                                                      |   |                                                                                       |
|------|-------|----------------------------------|--------------------------------------------------------------------------------------|---|---------------------------------------------------------------------------------------|
|      |       |                                  |                                                                                      | 9 | Unknown/No response for self-report                                                   |
|      | BS9_2 | SHS exposure at home             | How much did you inhale other's cigarette smoke indoors at home, in the past 7 days? | 1 | zero hour                                                                             |
|      |       |                                  |                                                                                      | 2 | Less than one hour                                                                    |
|      |       |                                  |                                                                                      | 3 | Equal to or more than one hour                                                        |
|      |       |                                  |                                                                                      | 8 | Not included (<19 years, no one in the family regularly smokes indoors at home)       |
|      |       |                                  |                                                                                      | 9 | Unknown/No response for self-report                                                   |
| 2014 | BS8_2 | SHS exposure at indoor workplace | Have you been inhaling other's cigarette smoke indoors at work, in the past 7 days?  | 1 | Yes                                                                                   |
|      |       |                                  |                                                                                      | 2 | No                                                                                    |
|      |       |                                  |                                                                                      | 8 | Not working                                                                           |
|      |       |                                  |                                                                                      | 9 | Unknown/No response for self-report                                                   |
|      | BS9_2 | SHS exposure at home             | Have you been inhaling other's cigarette smoke indoors at home, in the past 7 days?  | 1 | Yes                                                                                   |
|      |       |                                  |                                                                                      | 2 | No                                                                                    |
|      |       |                                  |                                                                                      | 8 | No one in the family regularly smokes indoors at home, except for himself or herself. |
|      |       |                                  |                                                                                      | 9 | Unknown/No response for self-report                                                   |

|      |       |                                  |                                                                                     |   |                                                                                       |
|------|-------|----------------------------------|-------------------------------------------------------------------------------------|---|---------------------------------------------------------------------------------------|
| 2018 | BS8_2 | SHS exposure at indoor workplace | Have you been inhaling other's cigarette smoke indoors at work, in the past 7 days? | 1 | Yes                                                                                   |
|      |       |                                  |                                                                                     | 2 | No                                                                                    |
|      |       |                                  |                                                                                     | 8 | Not working                                                                           |
|      |       |                                  |                                                                                     | 9 | Unknown/No response for self-report                                                   |
|      | BS9_2 | SHS exposure at home             | Have you been inhaling other's cigarette smoke indoors at home, in the past 7 days? | 1 | Yes                                                                                   |
|      |       |                                  |                                                                                     | 2 | No                                                                                    |
|      |       |                                  |                                                                                     | 3 | No one in the family regularly smokes indoors at home, except for himself or herself. |
|      |       |                                  |                                                                                     | 8 | Not included (<6 years)                                                               |
|      |       |                                  |                                                                                     | 9 | Unknown/No response for self-report                                                   |

**Supplementary Table S5.** Data processing related with self-report for SHS exposure status classification in each dataset

| Dataset | SHS exposure status | Description                                                                                                                                                                                                                   | Variant code            | Processing                                                                                                                                                                                                                                 |
|---------|---------------------|-------------------------------------------------------------------------------------------------------------------------------------------------------------------------------------------------------------------------------|-------------------------|--------------------------------------------------------------------------------------------------------------------------------------------------------------------------------------------------------------------------------------------|
| 2008    | SHS exposure        | a subject who reported a history of SHS exposure<br>at home or at indoor workplace among non-smokers                                                                                                                          | BS8_2, BS9_2, sm_presnt | (BS8_2=2 and sm_presnt=0) or<br>(BS8_2=3 and sm_presnt=0) or<br>(BS9_2=2 and sm_presnt=0) or<br>(BS9_2=3 and sm_presnt=0)                                                                                                                  |
|         | Unclear response    | a subject who is not included in SHS exposure<br>and who reported unclear history of SHS<br>exposure, such as no response, unknown response,<br>and non-defined response, at home or at indoor<br>workplace among non-smokers | BS8_2, BS9_2, sm_presnt | Step 1 selection<br>(BS8_2=9 and sm_presnt=0) or<br>(BS9_2=9 and sm_presnt=0)<br>Step 2 remove from selection<br>(BS8_2=2 and sm_presnt=0) or<br>(BS8_2=3 and sm_presnt=0) or<br>(BS9_2=2 and sm_presnt=0) or<br>(BS9_2=3 and sm_presnt=0) |
|         | No SHS exposure     | a subject who definitively reported no history of<br>SHS exposure at home and at indoor workplace<br>among non-smokers                                                                                                        | BS8_2, BS9_2, sm_presnt | [(BS8_2=1 and sm_presnt=0) or<br>(BS8_2=8 and sm_presnt=0)] and<br>[(BS9_2=1 and sm_presnt=0) or<br>(BS9_2=8 and sm_presnt=0)]                                                                                                             |

|      |                  |                                                                                                                                                                                                                   |                         |                                                                                                                                                                                                                                            |
|------|------------------|-------------------------------------------------------------------------------------------------------------------------------------------------------------------------------------------------------------------|-------------------------|--------------------------------------------------------------------------------------------------------------------------------------------------------------------------------------------------------------------------------------------|
| 2011 | SHS exposure     | a subject who reported a history of SHS exposure at home or at indoor workplace among non-smokers                                                                                                                 | BS8_2, BS9_2, sm_presnt | (BS8_2=2 and sm_presnt=0) or<br>(BS8_2=3 and sm_presnt=0) or<br>(BS9_2=2 and sm_presnt=0) or<br>(BS9_2=3 and sm_presnt=0)                                                                                                                  |
|      | Unclear response | a subject who is not included in SHS exposure and who reported unclear history of SHS exposure, such as no response, unknown response, and non-defined response, at home or at indoor workplace among non-smokers | BS8_2, BS9_2, sm_presnt | Step 1 selection<br>(BS8_2=9 and sm_presnt=0) or<br>(BS9_2=9 and sm_presnt=0)<br>Step 2 remove from selection<br>(BS8_2=2 and sm_presnt=0) or<br>(BS8_2=3 and sm_presnt=0) or<br>(BS9_2=2 and sm_presnt=0) or<br>(BS9_2=3 and sm_presnt=0) |
|      | No SHS exposure  | a subject who definitively reported no history of SHS exposure at home and at indoor workplace among non-smokers                                                                                                  | BS8_2, BS9_2, sm_presnt | [(BS8_2=1 and sm_presnt=0) or<br>(BS8_2=8 and sm_presnt=0)] and<br>[(BS9_2=1 and sm_presnt=0) or<br>(BS9_2=8 and sm_presnt=0)]                                                                                                             |
| 2014 | SHS exposure     | a subject who reported a history of SHS exposure at home or at indoor workplace among non-smokers                                                                                                                 | BS8_2, BS9_2, sm_presnt | (BS8_2=1 and sm_presnt=0) or<br>(BS9_2=1 and sm_presnt=0)                                                                                                                                                                                  |



|  |                   |                                                                                                                                                                                                                               |                         |                                                                                                                                                                            |
|--|-------------------|-------------------------------------------------------------------------------------------------------------------------------------------------------------------------------------------------------------------------------|-------------------------|----------------------------------------------------------------------------------------------------------------------------------------------------------------------------|
|  | Unclear response  | a subject who is not included in SHS exposure<br>and who reported unclear history of SHS<br>exposure, such as no response, unknown response,<br>and non-defined response, at home or at indoor<br>workplace among non-smokers | BS8_2, BS9_2, sm_presnt | Step 1 selection<br>(BS8_2=9 and sm_presnt=0) or<br>(BS9_2=9 and sm_presnt=0)<br>Step 2 remove from selection<br>(BS8_2=1 and sm_presnt=0) or<br>(BS9_2=1 and sm_presnt=0) |
|  | No SHS exposure   | a subject who definitively reported no history of<br>SHS exposure at home and at indoor workplace<br>among non-smokers                                                                                                        | BS8_2, BS9_2, sm_presnt | [(BS8_2=2 and sm_presnt=0) or<br>(BS8_2=8 and sm_presnt=0)] and<br>[(BS9_2=2 and sm_presnt=0) or<br>(BS9_2=8 and sm_presnt=0)]                                             |
|  | 2018 SHS exposure | a subject who reported a history of SHS exposure<br>at home or at indoor workplace among non-<br>smokers                                                                                                                      | BS8_2, BS9_2, sm_presnt | (BS8_2=1 and sm_presnt=0) or<br>(BS9_2=1 and sm_presnt=0)                                                                                                                  |
|  | Unclear response  | a subject who is not included in SHS exposure<br>and who reported unclear history of SHS<br>exposure, such as no response, unknown response,<br>and non-defined response, at home or at indoor<br>workplace among non-smokers | BS8_2, BS9_2, sm_presnt | Step 1 selection<br>(BS8_2=9 and sm_presnt=0) or<br>(BS9_2=8 and sm_presnt=0) or<br>(BS9_2=9 and sm_presnt=0)<br>Step 2 remove from selection                              |

(BS8\_2=1 and sm\_presnt=0) or

(BS9\_2=1 and sm\_presnt=0)

---

|                 |                                                                                                                        |                         |                                                                                                                                |
|-----------------|------------------------------------------------------------------------------------------------------------------------|-------------------------|--------------------------------------------------------------------------------------------------------------------------------|
| No SHS exposure | a subject who definitively reported no history of<br>SHS exposure at home and at indoor workplace<br>among non-smokers | BS8_2, BS9_2, sm_presnt | [(BS8_2=2 and sm_presnt=0) or<br>(BS8_2=8 and sm_presnt=0)] and<br>[(BS9_2=2 and sm_presnt=0) or<br>(BS9_2=3 and sm_presnt=0)] |
|-----------------|------------------------------------------------------------------------------------------------------------------------|-------------------------|--------------------------------------------------------------------------------------------------------------------------------|

---

**Supplementary Table S6.** Data processing related with self-report for current e-cigarette user classification in all datasets

| Smoking status                           | Description                                                                                                                    | Variant code      | Processing                               |
|------------------------------------------|--------------------------------------------------------------------------------------------------------------------------------|-------------------|------------------------------------------|
| Current e-cigarette user                 | a subject who reported a history of e-cigarette smoking within 30 days                                                         | BS12_2            | BS12_2=1                                 |
| Non- e-cigarette user                    | a subject who did not meet the current e-cigarette user definition among responded subjects for self-report for smoking status | BS12_2            | BS12_2=2, or<br>BS12_2=8, or<br>BS12_2=9 |
| Current smoker with usage of e-cigarette | a subject who reported “Yes, I smoked e-cigarette within 30 days”, among current smokers                                       | BS12_2, sm_presnt | BS3_1=1 and sm_presnt=1                  |
| Non-smoker with usage of e-cigarette     | a subject who reported “Yes, I smoked e-cigarette within 30 days”, among non-smokers.                                          | BS12_2, sm_presnt | BS3_1=1 and sm_presnt=0                  |

**Supplementary Table S7.** The measurement procedures and parameters of surveys.

| Parameters                                                                   | KNHANES (2008-2018) |             |              |              |
|------------------------------------------------------------------------------|---------------------|-------------|--------------|--------------|
|                                                                              | 2008                | 2011        | 2014         | 2018         |
| Measurement procedure of urinary cotinine                                    | GC-MS/MS            | GC-MS/MS    | GC-MS/MS     | HPLC-MS/MS   |
| LoD (µg/L)                                                                   | 0.25                | 0.25        | 0.27         | 0.27         |
| Participants with equal to or less than LoD of urinary cotinine (n, %)       | 1129 (20.0%)        | 114 (6.1%)  | 202 (4.1%)   | 1216 (21.1%) |
| Participants with equal to or less than 0.30 µg/L of urinary cotinine (n, %) | 1129 (20.0%)        | 114 (6.1%)  | 202 (4.1%)   | 1216 (21.1%) |
| LoQ (µg/L)                                                                   | 0.75                | 0.75        | 0.82         | 0.31         |
| Participants with equal to or less than LoQ of urinary cotinine (n, %)       | 1274 (22.5%)        | 207 (11.2%) | 1373 (27.8%) | 1252 (21.7%) |
| Participants with equal to or less than 0.75 µg/L of urinary cotinine (n, %) | 1274 (22.5%)        | 207 (11.2%) | 1222 (24.7%) | 3363 (58.2%) |

LoD=the limit of detection, LoQ=the limit of quantitation.

## Figure Legend

### 2018 KNHANES

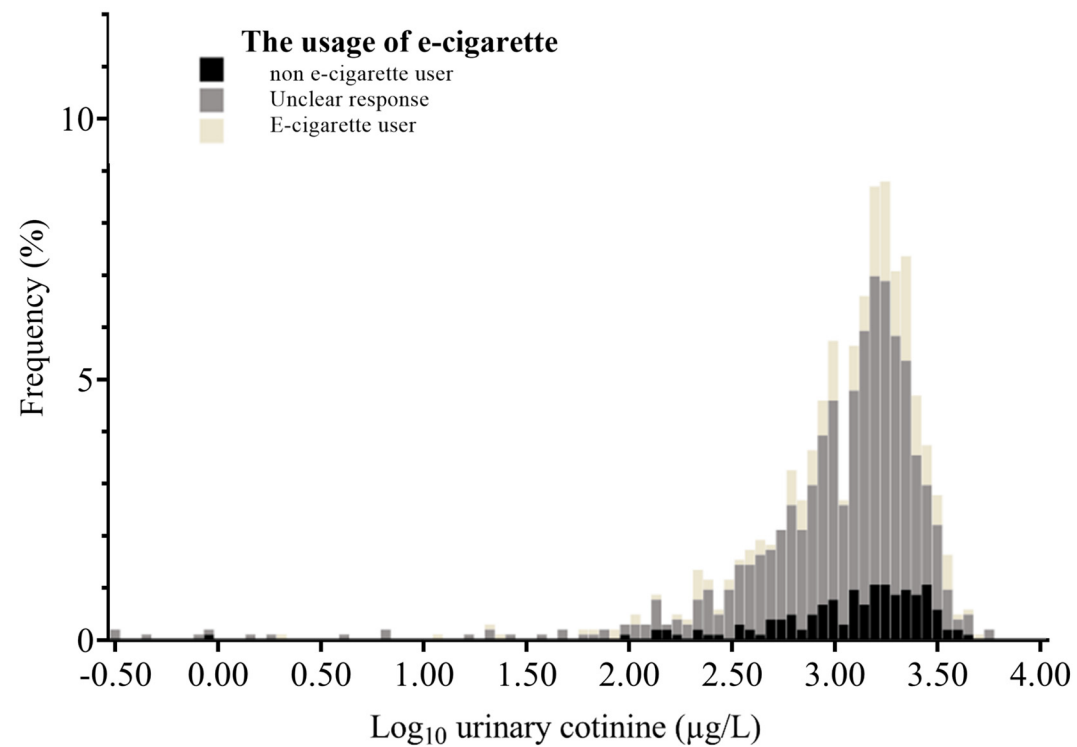

**Supplementary Figure S1.** Distributions of urinary cotinine concentration according to the usage of e-cigarette among current smokers in 2018

KNHANES

The questionnaire for e-cigarette is only included in 2014 and 2018 KNHANES survey, among four KNHANES datasets.

## 2018 KNHANES

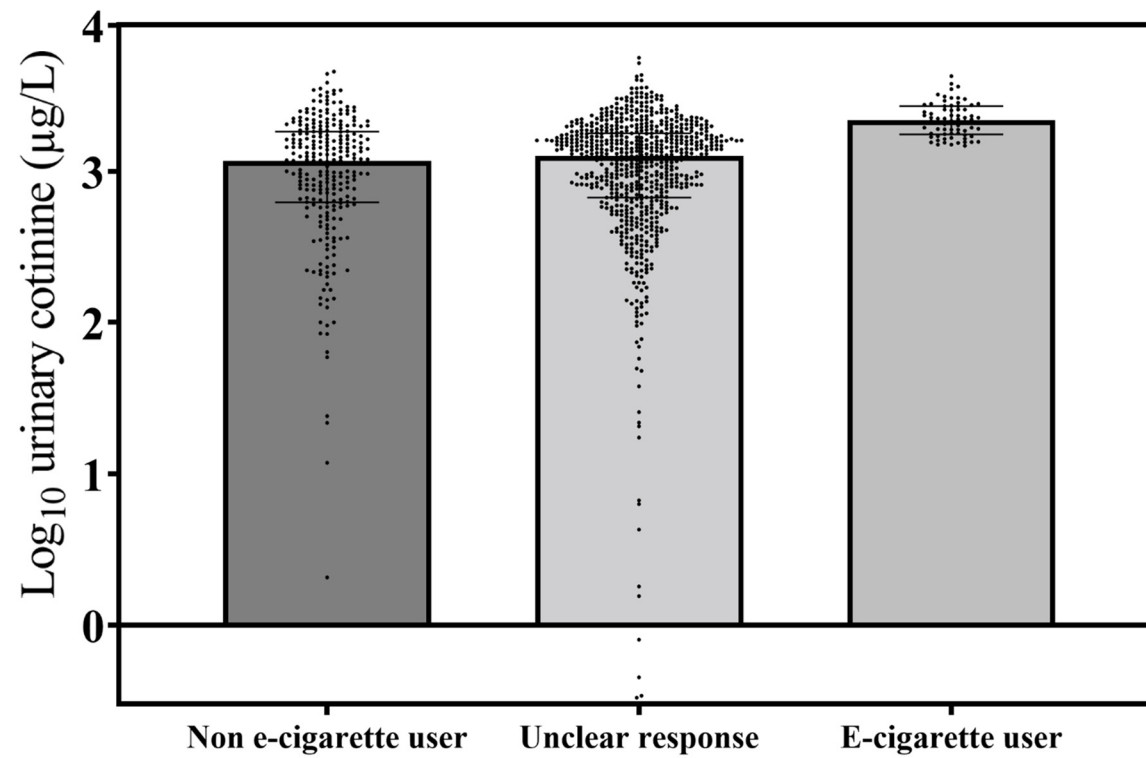

**Supplementary Figure S2.** The comparison of urinary cotinine concentration according to the usage of e-cigarette among current smokers in 2018 KNHANES

The questionnaire for e-cigarette is only included in 2014 and 2018 KNHANES survey, among four KNHANES datasets.
